# Supplementary material for: Genetic and epigenetic silencing of mircoRNA-506-3p enhances COTL1 oncogene expression to foster non-small lung cancer progression
Source: PubMed Central journal article supplement (PMC5352185; doi:10.18632/oncotarget.13501), 2016-11-22
Supplement: oncotarget-08-644-s001.pdf [file oncotarget-08-644-s001.pdf]

## Genetic and epigenetic silencing of mircoRNA-506-3p enhances COTL1 oncogene expression to foster non-small lung cancer progression

### Supplementary Materials

**Supplementary Table S1: Primer list**

| qRT-PCR   |         |                         |
|-----------|---------|-------------------------|
| GAPDH     | forward | GGAGCGAGATCCCTCCAAAAT   |
|           | reverse | GGCTGTTGTCATACTTCTCATGG |
| U6        | forward | GTGCTCGCTTCGGCAGCACA    |
|           | reverse | GCAAATTCGTGAAGCGTTCC    |
| COTL1     | forward | AGTTGACGGAGGGAGTATTT    |
|           | reverse | CAGACGCAGGACTGAAGC      |
| GATA3     | forward | GCCCCTCATTAAGCCCAAG     |
|           | reverse | TTGTGGTGGTCTGACAGTTCCG  |
| UCA1      | forward | TTTATGCTTGAGCCTTGA      |
|           | reverse | CTTGCCTGAAATACTTGC      |
| ChIP-qPCR |         |                         |
| GATA3     | forward | AAGAATGTGATAGCAACG      |
|           | reverse | AGCTCCAACAATGACAG       |

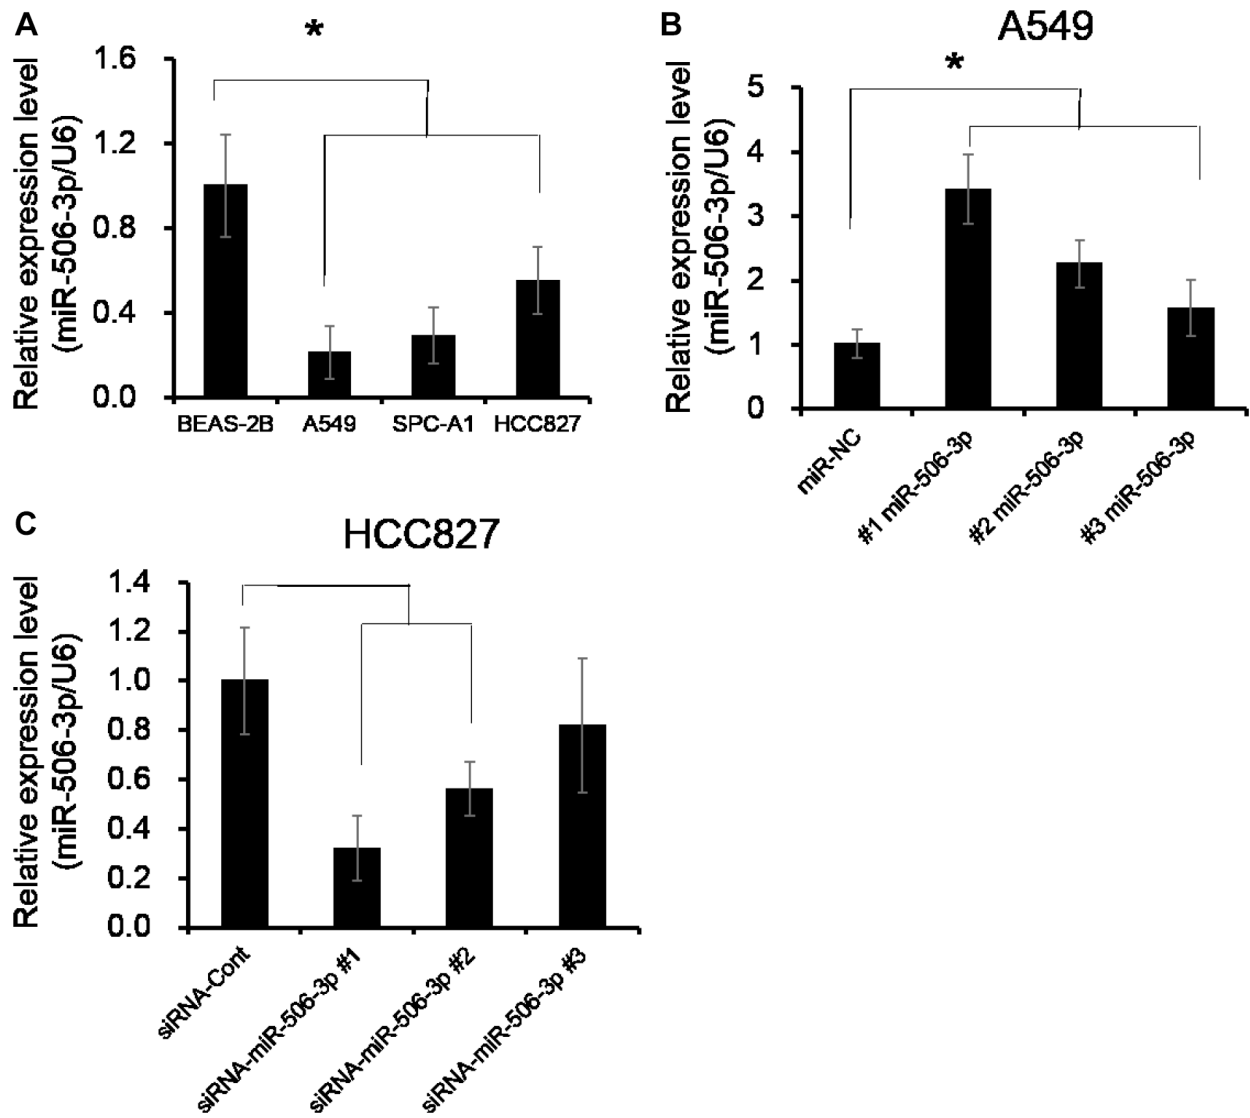

**Supplementary Figure S1:** (A) qPCR showed miR-506-3p expression was downregulated in A549, HCC827 and SPC-A1 cells compared with that of BEAS-2B cells. (B) qPCR showed miR-506-3p were upregulated when transfected by different miR-506-3p mimics in A549 cells. #1 miR-506-3p was selected in the present study. C. qPCR showed miR-506-3p were downregulated when transfected by different miR-506-3p siRNAs in HCC827 cells. siRNA-miR-506-3p #1 was selected in the present study. Asterisk (\*) indicated  $P < 0.05$ .

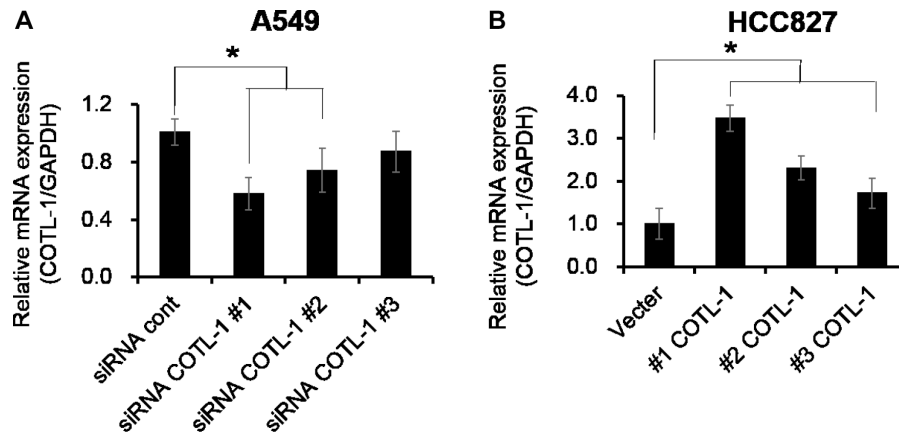

**Supplementary Figure S2:** (A) qPCR showed COTL1 was downregulated when transfected by different COTL1 siRNAs in A549 cells. siRNA COTL1 #1 was selected in the present study. (B) qPCR showed COTL1 was upregulated when transfected by different miR-506-3p plasmids in HCC827 cells. #1 COTL1 was selected in the present study. Asterisk (\*) indicated  $P < 0.05$ .

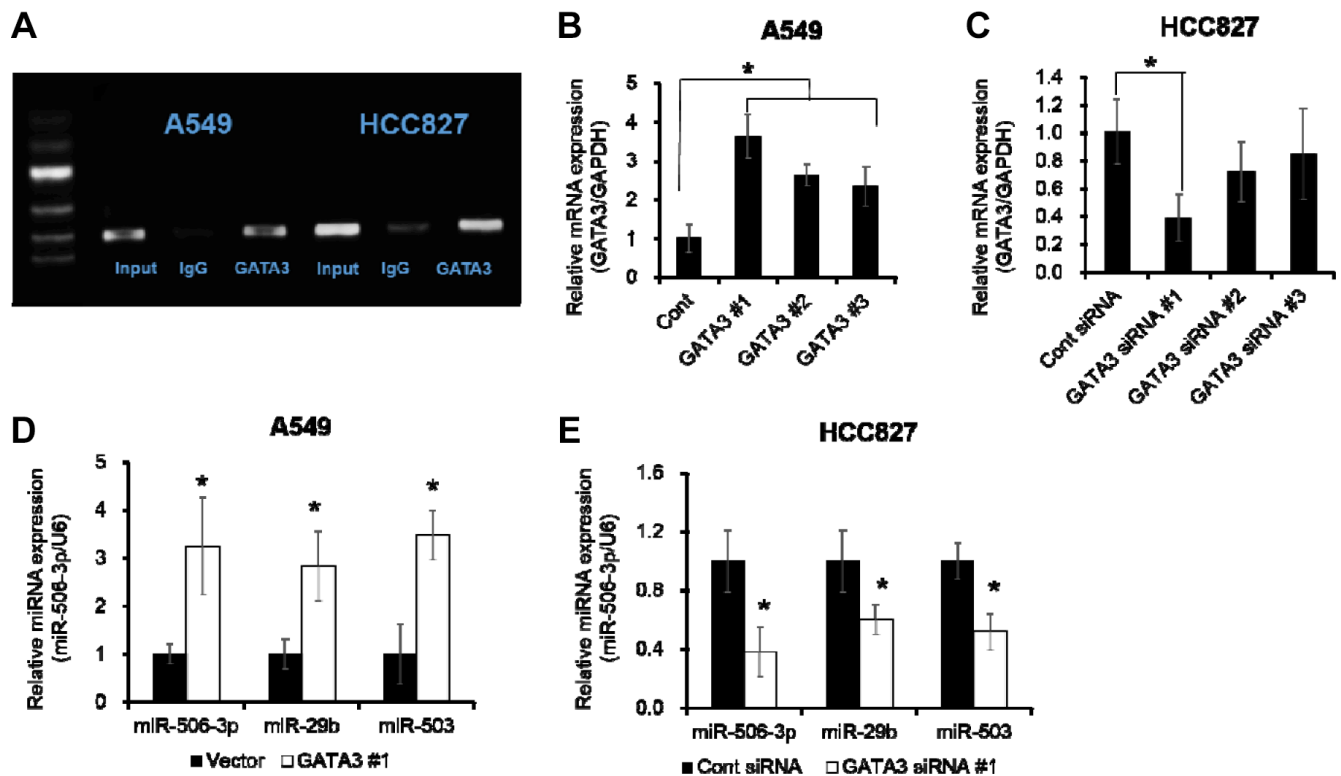

**Supplementary Figure S3:** (A) ChIP-PCR showed the levels of GATA3 at mature miR-506 promoter region in A549 cells and HCC827 cells. (B) qPCR showed GATA3 were upregulated when transfected by different GATA3 plasmids in A549 cells. GATA3 #1 was selected in the present study. (C) qPCR showed GATA3 were downregulated when transfected by different GATA3 siRNAs in HCC827 cells. GATA3 siRNA #1 was selected in the present study. (D) qPCR showed miR-506-3p miR-29b and miR-503 were upregulated in GATA3-transfected A549 cells. (E) qPCR showed miR-506-3p, miR-29b and miR-503 were downregulated when transfected by GATA3 siRNA in HCC827 cells. Asterisk (\*) indicated  $P < 0.05$ .

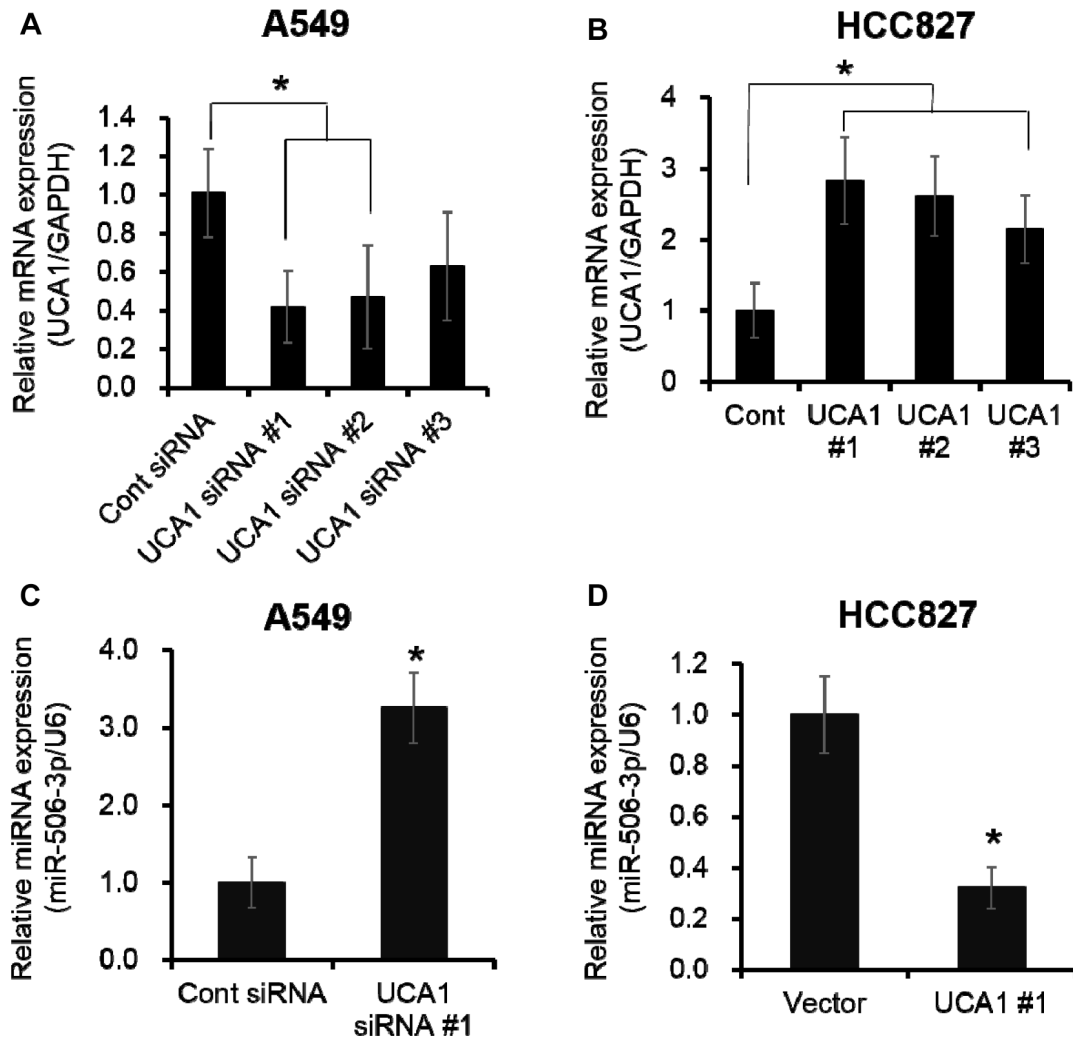

**Supplementary Figure S4:** (A) qPCR showed UCA1 was downregulated when transfected by different UCA1 siRNAs in A549 cells. siRNA UCA1 #1 was selected in the present study. (B) qPCR showed UCA1 were upregulated when transfected by different UCA1 plasmids in HCC827 cells. UCA1 #1 was selected in the present study. (C) qPCR showed miR-506-3p was upregulated when transfected by UCA1 siRNA in A549 cells. E. qPCR showed miR-506-3p was downregulated in UCA1-transfected HCC827 cells. Asterisk (\*) indicated  $P < 0.05$ .
